# Supplementary material for: Significance and Possible Biological Mechanism for CLDN8 Downregulation in Kidney Renal Clear Cell Carcinoma Tissues
Source: PubMed Central journal article supplement — World J Oncol. 2024 Jul 5;15(4):662–74. doi: 10.14740/wjon1869 (PMC11236366; doi:10.14740/wjon1869), 2024-07-05
Supplement: wjon-15-662-s001.pdf [file wjon-15-662-s001.pdf]

## Supplementary Material

**Suppl 1.** mRNA datasets of kidney renal clear cell carcinoma obtained from GEO, ArrayExpress, and TCGA databases

| Platform                | Dataset     | KIRC tissues | Non-KIRC tissues |
|-------------------------|-------------|--------------|------------------|
| —                       | E-MTAB-3033 | 91           | 45               |
| —                       | E-TABM-282  | 16           | 11               |
| GPL96                   | GSE781      | 9            | 8                |
|                         | GSE15641    | 32           | 23               |
|                         | GSE6344     | 10           | 10               |
| GPL97                   | GSE781      | 9            | 8                |
| (Lacking <i>CLDN8</i> ) | GSE6344     | 10           | 10               |
| GPL570                  | GSE11151    | 26           | 5                |
|                         | GSE66270    | 14           | 14               |
|                         | GSE53757    | 72           | 72               |
| GPL6244                 | GSE68417    | 29           | 14               |
|                         | GSE53000    | 53           | 6                |
| GPL4866                 | GSE14762    | 10           | 12               |
| GPL10558                | GSE40435    | 101          | 101              |
| GPL5175                 | GSE47032    | 10           | 10               |
| GPL16791                | GSE76207    | 32           | 32               |
| GPL6480                 | GSE16441    | 17           | 17               |
| (Lacking <i>CLDN8</i> ) |             |              |                  |
| GPL11532                | GSE76351    | 12           | 12               |
| GPL19615                | GSE96574    | 5            | 5                |
| —                       | TCGA-KIRC   | 538          | 72               |

Note: KIRC: kidney renal clear cell carcinoma.
