# Supplementary material for: Significance and Possible Biological Mechanism for CLDN8 Downregulation in Kidney Renal Clear Cell Carcinoma Tissues
Source: PubMed Central journal article supplement — World J Oncol. 2024 Jul 5;15(4):662–74. doi: 10.14740/wjon1869 (PMC11236366; doi:10.14740/wjon1869), 2024-07-05
Supplement: wjon-15-662-s004.pdf [file wjon-15-662-s004.pdf]

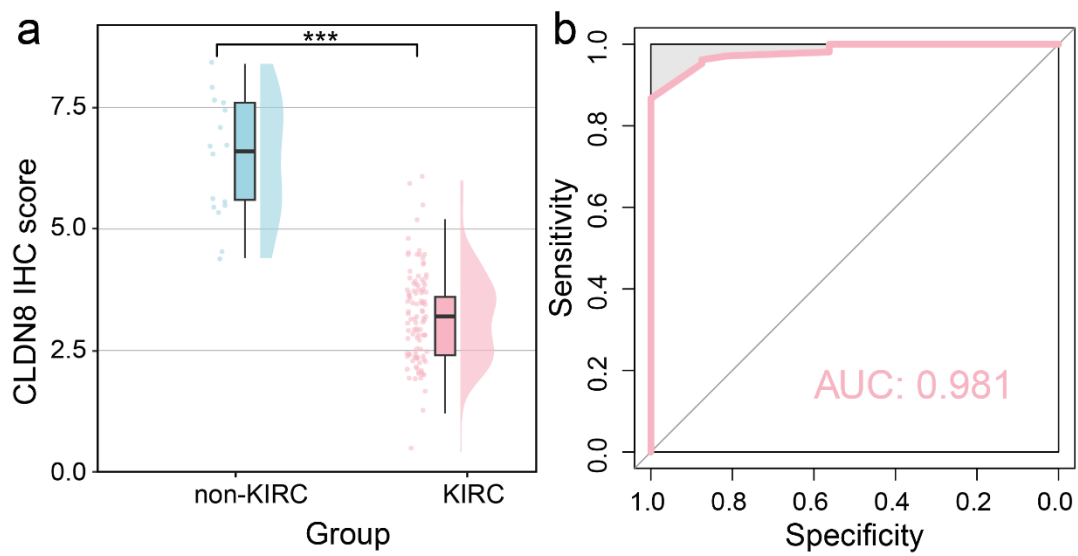

**Suppl 4.** Downregulation of CLDN8 protein in kidney renal clear cell carcinoma tissues. (a) Comparison of immunohistochemical staining scores of CLDN8 protein in kidney renal clear cell carcinoma (KIRC) and non-KIRC tissues (unpaired Wilcoxon test,  $p < 0.001$ ). (b) The robust discriminatory ability of CLDN8 protein between KIRC and non-KIRC tissues.
