# Supplementary material for: Significance and Possible Biological Mechanism for CLDN8 Downregulation in Kidney Renal Clear Cell Carcinoma Tissues
Source: PubMed Central journal article supplement — World J Oncol. 2024 Jul 5;15(4):662–74. doi: 10.14740/wjon1869 (PMC11236366; doi:10.14740/wjon1869), 2024-07-05
Supplement: wjon-15-662-s005.pdf [file wjon-15-662-s005.pdf]

**Suppl 5.** Correlations between *CLDN8* mRNA expression and clinicopathological parameters of kidney renal clear cell carcinoma patients (\**p*<0.05).

| Clinicopathological features |                                | N        | <i>CLDN8</i> expression |            |           |
|------------------------------|--------------------------------|----------|-------------------------|------------|-----------|
|                              |                                |          | Mean ± SD               | <i>p</i>   | F/t       |
| Gender                       | Male                           | 35<br>2  | 0.73±1.90               | 0.25       | 1.16      |
|                              | Female                         | 18<br>6  |                         |            |           |
| Age                          | <50 years                      | 10<br>7  | 0.74±1.93               | 0.64       | 0.46      |
|                              | ≥50 years                      | 43<br>1  |                         |            |           |
| Ethnicity                    | Hispanic or Latino             | 26       | 0.25±0.92               | <0.01<br>* | 11.7<br>1 |
|                              | Not Hispanic or Latino         | 36<br>1  | 0.84±1.99               |            |           |
|                              | Not evaluated or not available | 15<br>1  | 0.33±1.05               |            |           |
| Tumor status                 | T <sub>1</sub>                 | 27<br>7  | 0.80±1.77               | 0.88       | 0.66      |
|                              | T <sub>2</sub>                 | 71<br>17 | 1.01±2.84               |            |           |
|                              | T <sub>3</sub>                 | 9        | 0.34±0.92               |            |           |
|                              | T <sub>4</sub>                 | 11       | 0.66±1.83               |            |           |
| Node status                  | N <sub>0</sub>                 | 24<br>1  | 0.62±1.70               | 0.51       | 0.67      |
|                              | N <sub>1</sub>                 | 16       | 0.28±0.48               |            |           |
|                              | N <sub>x</sub>                 | 28<br>1  | 0.73±1.84               |            |           |
| Metastasis status            | M <sub>0</sub>                 | 44<br>8  | 0.73±1.86               | 0.77       | 0.53      |
|                              | M <sub>1</sub>                 | 80       | 0.37±1.02               |            |           |
|                              | M <sub>x</sub>                 | 10       | 0.18±0.22               |            |           |
| Tumor grade                  | G <sub>1</sub>                 | 14       | 0.05±0.08               | 0.09       | 9.59      |
|                              | G <sub>2</sub>                 | 23<br>5  | 0.83±1.93               |            |           |
|                              | G <sub>3</sub>                 | 20<br>6  | 0.47±1.31               |            |           |
|                              | G <sub>4</sub>                 | 75       | 0.39±1.04               |            |           |
|                              | G <sub>x</sub>                 | 5        | 6.14±5.64               |            |           |
|                              | Not available                  | 3        | 2.20±3.81               |            |           |
| Tumor stage                  | Stage I                        | 27<br>1  | 0.81±1.78               | 0.67       | 2.38      |
|                              | Stage II                       | 59       | 1.18±3.09               |            |           |
|                              | Stage III                      | 12<br>3  | 0.33±0.92               |            |           |
|                              | Stage IV                       | 82       | 0.36±1.01               |            |           |
|                              | Unknown                        | 3        | 0.22±0.20               |            |           |
| Survival status              | Alive                          | 36<br>6  | 0.77±1.95               | 0.02 *     | 2.39      |
|                              | Dead                           | 17<br>2  | 0.45±1.19               |            |           |
